# Supplementary material
Source: publisher site journal article supplement (https://www.spandidos-publications.com/3715/downloadSupplementary)
Supplement: Supplementary file 1 [file downloadSupplementary]

## Sheet: Table SⅣ
Table SIV. All differentially expressed geness of GSE7084.
Symbol	log2FC	P-value	Group
MMP9	4.02	9.81X10-5	UP
FOSB	3.79	1.22X10-5	UP
HMOX1	3.52	1.67X10-5	UP
HLA-DRB3	3.38	2.95X10-3	UP
CD52	3.34	4.72X10-6	UP
Hs.449584	3.28	6.79X10-3	UP
IL8	3.22	1.99X10-4	UP
CCL3L1	3.2	2.44X10-7	UP
IL4I1	3.2	1.49X10-6	UP
CCL4	3.16	3.18X10-6	UP
Hs.449605	3.09	2.28X10-2	UP
CD83	3.08	2.00X10-8	UP
LTB	3.08	6.77X10-5	UP
NCF1	3.06	6.45X10-7	UP
hmm10298	3.05	6.79X10-3	UP
LOC388978	3.01	1.26X10-2	UP
LOC115281	2.99	1.91X10-2	UP
FCN1	2.97	1.04X10-4	UP
Hs.512124	2.96	6.29X10-3	UP
LYZ	2.96	3.70X10-7	UP
APOE	2.94	2.95X10-4	UP
IFI30	2.94	3.17X10-5	UP
CCL3	2.87	1.26X10-8	UP
IL1RN	2.86	6.06X10-5	UP
IL1B	2.86	1.42X10-5	UP
Hs.406489	2.85	3.18X10-2	UP
APOC1	2.84	8.32X10-5	UP
Hs.512137	2.83	2.04X10-2	UP
TNFRSF7	2.8	8.15X10-4	UP
ECGF1	2.78	6.46X10-6	UP
MMP25	2.77	1.11X10-6	UP
SH3BP1	2.74	1.39X10-9	UP
LOC391392	2.73	6.12X10-3	UP
PLEK	2.73	8.26X10-8	UP
CD37	2.73	5.38X10-5	UP
RUNX3	2.73	3.17X10-8	UP
MMP12	2.7	1.13X10-3	UP
HLA-DQA1	2.69	2.08X10-2	UP
MZB1	2.68	9.38X10-3	UP
FLJ21438	2.67	2.59X10-7	UP
IGJ	2.65	7.53X10-3	UP
CCL2	2.64	2.91X10-4	UP
CCL8	2.62	2.61X10-5	UP
UCP2	2.61	6.59X10-6	UP
TYROBP	2.59	5.18X10-5	UP
LCP1	2.59	2.75X10-7	UP
CD53	2.58	3.94X10-8	UP
Hs.449609	2.57	6.96X10-3	UP
CXCL2	2.57	4.91X10-6	UP
Hs.449602	2.55	3.13X10-2	UP
HLA-DRB4	2.54	2.48X10-4	UP
FBP1	2.53	9.21X10-5	UP
SGK	2.53	3.86X10-6	UP
ACP5	2.53	7.41X10-5	UP
HEM1	2.51	8.76X10-10	UP
CYBA	2.51	2.94X10-4	UP
MPEG1	2.51	1.47X10-6	UP
TCL1A	2.48	2.98X10-3	UP
CTSH	2.47	5.46X10-6	UP
LOC374572	2.47	2.57X10-2	UP
C8FW	2.47	6.09X10-6	UP
CAPG	2.43	2.67X10-5	UP
LTF	2.42	1.13X10-3	UP
CORO1A	2.41	1.74X10-5	UP
MNDA	2.41	7.01X10-6	UP
SYK	2.39	2.96X10-8	UP
PRKCB1	2.39	1.52X10-6	UP
AMICA	2.39	2.12X10-7	UP
ARHGAP4	2.38	1.37X10-5	UP
LAPTM5	2.37	1.99X10-7	UP
EDG6	2.37	5.33X10-6	UP
CD48	2.36	3.93X10-4	UP
hmm7418	2.35	1.54X10-4	UP
TCF7	2.35	1.99X10-4	UP
FCRLA	2.35	1.03X10-3	UP
EBI2	2.33	1.42X10-5	UP
SERPINA1	2.3	4.73X10-4	UP
CD22	2.3	9.35X10-5	UP
NMES1	2.3	4.62X10-4	UP
VAMP8	2.3	1.49X10-4	UP
PTPN6	2.29	3.95X10-5	UP
OSM	2.29	4.07X10-5	UP
C1orf38	2.29	1.12X10-6	UP
HLA-DQB1	2.29	2.37X10-4	UP
CTSS	2.28	4.15X10-7	UP
ARHGAP9	2.28	4.47X10-7	UP
hmm3048	2.26	7.83X10-4	UP
NCF2	2.26	8.72X10-5	UP
CCR1	2.25	7.73X10-5	UP
SNX10	2.22	7.25X10-8	UP
ITGAX	2.22	1.38X10-4	UP
CCR7	2.22	1.12X10-3	UP
hmm3574	2.22	8.10X10-3	UP
SDS	2.22	9.47X10-4	UP
RNASET2	2.21	6.64X10-6	UP
HLA-DRA	2.21	8.10X10-4	UP
PTPRCAP	2.21	7.22X10-3	UP
FAIM3	2.19	5.19X10-3	UP
CD79A	2.19	9.88X10-3	UP
COTL1	2.19	8.96X10-5	UP
LY86	2.18	7.36X10-6	UP
RASSF2	2.18	1.13X10-6	UP
WAS	2.18	4.67X10-5	UP
CCL5	2.18	3.34X10-6	UP
CXCL5	2.18	7.38X10-7	UP
LOC283663	2.17	3.97X10-3	UP
MMP7	2.17	9.40X10-3	UP
LPXN	2.17	4.70X10-8	UP
WBSCR5	2.17	7.98X10-6	UP
CD209L	2.16	1.32X10-2	UP
C4orf7	2.16	7.99X10-3	UP
RAC2	2.16	6.23X10-4	UP
CD14	2.16	4.66X10-4	UP
EGR2	2.15	3.04X10-5	UP
CMRF35	2.15	4.56X10-6	UP
HLA-DMB	2.15	1.99X10-8	UP
CCL18	2.15	1.24X10-2	UP
PSCD4	2.13	1.03X10-5	UP
LILRB2	2.12	1.04X10-6	UP
CSF3R	2.11	2.62X10-3	UP
GPSM3	2.11	2.63X10-5	UP
CECR1	2.11	2.49X10-6	UP
FPRL2	2.09	4.71X10-5	UP
LCP2	2.09	2.62X10-8	UP
ASC	2.08	1.00X10-6	UP
PPIF	2.08	4.25X10-5	UP
EVI2B	2.08	1.22X10-5	UP
ITGB2	2.07	2.25X10-4	UP
AQP9	2.07	1.92X10-3	UP
DHRS9	2.06	1.87X10-5	UP
TBC1D10C	2.06	1.24X10-3	UP
PLA2G7	2.06	1.57X10-5	UP
HCLS1	2.05	3.91X10-4	UP
NCF4	2.05	7.69X10-6	UP
CSF1R	2.04	3.37X10-5	UP
TREM1	2.02	2.54X10-4	UP
DOCK2	2.01	1.55X10-5	UP
OLR1	2.01	1.49X10-2	UP
CEMIP	2.01	5.84X10-3	UP
LOC155340	2	1.60X10-9	UP
ADAM8	2	4.99X10-5	UP
LYN	2	5.54X10-6	UP
HAVCR2	2	8.80X10-5	UP
PIK3CD	1.99	1.12X10-5	UP
SEMA4A	1.99	2.07X10-6	UP
HCST	1.99	9.93X10-5	UP
ARHGAP30	1.99	1.27X10-8	UP
SPP1	1.98	1.30X10-2	UP
ALOX5	1.98	5.29X10-5	UP
CPVL	1.98	5.95X10-6	UP
hmm3577	1.98	1.51X10-2	UP
CD86	1.97	6.71X10-8	UP
PPBP	1.97	3.66X10-3	UP
FAM31C	1.97	6.41X10-7	UP
STK10	1.96	4.10X10-6	UP
SEMA4D	1.95	1.01X10-5	UP
CIAS1	1.95	9.61X10-6	UP
CD2	1.94	1.19X10-3	UP
CSK	1.94	5.79X10-6	UP
G0S2	1.94	7.76X10-3	UP
SLAMF7	1.94	5.17X10-6	UP
DEF6	1.94	2.20X10-5	UP
HLA-DMA	1.94	2.24X10-5	UP
PLAUR	1.93	5.51X10-4	UP
SLC37A2	1.93	1.02X10-5	UP
EFHD2	1.93	8.40X10-6	UP
ICAM3	1.92	2.41X10-3	UP
LCK	1.92	1.03X10-3	UP
LOC201176	1.91	9.62X10-7	UP
DOCK8	1.91	8.37X10-11	UP
CENTA1	1.9	1.01X10-6	UP
CD68	1.9	3.91X10-5	UP
SLAMF8	1.9	5.59X10-4	UP
PPP1R16B	1.89	3.77X10-3	UP
CENTA2	1.88	1.16X10-5	UP
SCD	1.88	9.89X10-4	UP
LSP1	1.88	6.20X10-5	UP
FABP5	1.88	1.10X10-3	UP
RGS19	1.88	3.90X10-10	UP
BTK	1.87	8.88X10-6	UP
FUCA1	1.87	3.24X10-5	UP
STXBP2	1.87	1.50X10-4	UP
LGMN	1.87	3.77X10-6	UP
GMFG	1.86	1.25X10-7	UP
CHST13	1.86	1.77X10-4	UP
SLC7A7	1.86	4.15X10-6	UP
NFKBIE	1.85	4.82X10-7	UP
hmm10289	1.85	2.94X10-2	UP
IL8RB	1.85	4.99X10-4	UP
KIAA1363	1.85	2.10X10-10	UP
PSMB10	1.84	2.71X10-5	UP
KIAA0053	1.84	1.18X10-4	UP
SLC15A3	1.84	1.24X10-4	UP
MAPKAPK3	1.84	4.42X10-5	UP
ANPEP	1.84	4.86X10-4	UP
CXCR4	1.83	8.72X10-5	UP
AIM1	1.83	1.71X10-4	UP
CYBB	1.83	5.23X10-5	UP
C5R1	1.83	7.07X10-4	UP
URP2	1.83	1.06X10-4	UP
SELL	1.83	7.42X10-3	UP
KIAA0746	1.82	3.02X10-3	UP
SCO2	1.82	7.21X10-4	UP
CD19	1.81	1.68X10-2	UP
CTSG	1.8	1.37X10-2	UP
CEBPA	1.8	3.92X10-4	UP
FGR	1.8	1.30X10-3	UP
IL2RG	1.79	4.62X10-4	UP
GRN	1.79	5.63X10-6	UP
CCL22	1.79	2.72X10-8	UP
TNFRSF1B	1.79	5.16X10-5	UP
PIM2	1.78	2.75X10-3	UP
PRDM1	1.78	2.04X10-6	UP
IRF7	1.78	2.35X10-5	UP
EPSTI1	1.77	5.60X10-6	UP
BM-009	1.77	7.84X10-6	UP
GPR65	1.77	1.37X10-7	UP
IGSF6	1.77	7.71X10-7	UP
DAPK1	1.76	1.32X10-6	UP
CD3E	1.76	6.79X10-3	UP
FPR1	1.76	2.74X10-3	UP
TREM2	1.75	2.19X10-3	UP
LIME1	1.75	1.57X10-3	UP
FLJ33641	1.75	9.04X10-6	UP
AIF1	1.75	3.23X10-3	UP
PLAU	1.75	1.68X10-3	UP
DKFZp686O1689	1.75	2.37X10-3	UP
MS4A6A	1.75	7.73X10-4	UP
NFKBIZ	1.74	1.13X10-3	UP
FCER2	1.74	1.03X10-2	UP
ISG20	1.74	9.65X10-4	UP
EVER1	1.74	5.06X10-5	UP
CMRF-35H	1.73	6.84X10-6	UP
IL10RA	1.73	6.09X10-6	UP
HN1	1.73	8.56X10-5	UP
CLECSF5	1.73	1.41X10-4	UP
CARD11	1.73	1.15X10-3	UP
LOC64744	1.73	4.25X10-3	UP
PTPRC	1.72	2.98X10-6	UP
FCGR2B	1.72	4.42X10-5	UP
TNFSF13B	1.72	1.10X10-4	UP
SPI1	1.71	7.20X10-6	UP
LILRB3	1.71	1.77X10-3	UP
KYNU	1.71	1.21X10-5	UP
HLA-DPB1	1.71	2.30X10-5	UP
TBXAS1	1.71	2.02X10-5	UP
MAPK13	1.7	1.45X10-6	UP
MGC50844	1.7	8.83X10-6	UP
MX2	1.7	3.00X10-4	UP
HS3ST1	1.7	1.62X10-4	UP
ADAMDEC1	1.68	1.24X10-4	UP
BLK	1.68	9.27X10-3	UP
CXCL13	1.68	6.57X10-3	UP
CLN6	1.68	1.05X10-7	UP
FLJ37970	1.67	1.62X10-5	UP
TNFRSF21	1.67	4.92X10-5	UP
MFNG	1.67	2.78X10-3	UP
LIPA	1.67	1.17X10-4	UP
CKLFSF7	1.67	3.05X10-5	UP
SLCO2B1	1.67	6.37X10-4	UP
SLC2A5	1.67	9.36X10-5	UP
RNASE1	1.67	7.02X10-3	UP
CXCL16	1.67	1.01X10-3	UP
RGS18	1.67	4.30X10-4	UP
HA-1	1.66	6.73X10-6	UP
PDE6G	1.66	5.25X10-4	UP
C10orf45	1.66	1.55X10-6	UP
MGC21854	1.66	4.89X10-4	UP
CD4	1.66	3.76X10-4	UP
C14orf58	1.65	1.08X10-5	UP
PSCD1	1.65	9.37X10-4	UP
STX11	1.65	9.74X10-5	UP
SPOCK2	1.65	3.40X10-3	UP
GPR160	1.64	1.52X10-4	UP
TCIRG1	1.63	8.55X10-4	UP
KLHL6	1.63	2.74X10-5	UP
FCER1G	1.63	5.25X10-3	UP
CCR5	1.63	1.84X10-7	UP
BCL2A1	1.63	3.57X10-4	UP
CTSB	1.63	7.93X10-4	UP
GBP5	1.63	3.95X10-6	UP
ICSBP1	1.63	3.01X10-5	UP
PLAC8	1.63	2.20X10-3	UP
VPREB3	1.62	1.90X10-2	UP
NPL	1.61	6.97X10-5	UP
LACTB	1.61	1.18X10-4	UP
IRAK1	1.6	8.49X10-4	UP
CD74	1.6	8.59X10-4	UP
FCGR3A	1.6	1.01X10-3	UP
IER3	1.6	1.77X10-2	UP
BCL11A	1.6	1.57X10-3	UP
ITK	1.6	9.22X10-3	UP
FLJ10199	1.6	2.55X10-4	UP
MMP1	1.59	2.18X10-4	UP
GGA2	1.59	2.10X10-4	UP
BANK1	1.59	2.35X10-2	UP
MGC24133	1.59	1.67X10-4	UP
NUP210	1.59	8.01X10-4	UP
MR-1	1.58	5.56X10-4	UP
GNA15	1.58	5.86X10-5	UP
CD84	1.58	1.37X10-6	UP
T3JAM	1.58	4.13X10-4	UP
VIL2	1.58	2.56X10-3	UP
ACAP1	1.58	6.11X10-3	UP
hmm36220	1.58	3.11X10-3	UP
GM2A	1.58	5.28X10-6	UP
EMR2	1.57	1.08X10-6	UP
LOC284454	1.57	4.83X10-4	UP
C6orf115	1.57	1.22X10-5	UP
LOC285296	1.57	1.50X10-5	UP
MGC34680	1.57	3.99X10-4	UP
TNFRSF18	1.57	8.46X10-5	UP
CTSL	1.57	9.18X10-4	UP
PSCDBP	1.56	6.20X10-4	UP
MARCO	1.56	2.04X10-2	UP
LOC375391	1.56	2.01X10-5	UP
ITGAM	1.55	1.23X10-3	UP
CD3D	1.55	1.55X10-2	UP
SLC31A2	1.55	3.74X10-5	UP
NKIR	1.55	4.21X10-5	UP
CD209	1.54	4.27X10-2	UP
AMPD3	1.54	1.06X10-6	UP
hmm10292	1.54	1.59X10-2	UP
PARVG	1.54	2.71X10-3	UP
FLJ20273	1.54	1.36X10-5	UP
FLJ31978	1.54	8.16X10-4	UP
LOC400586	1.53	3.78X10-4	UP
KCNN4	1.53	7.67X10-5	UP
VAV1	1.53	1.29X10-4	UP
C2	1.53	3.17X10-3	UP
ALOX5AP	1.53	1.59X10-3	UP
VNN2	1.53	5.92X10-3	UP
PIK3CG	1.52	2.49X10-9	UP
MGC45871	1.52	2.58X10-3	UP
CD8A	1.52	3.53X10-3	UP
MAF	1.52	5.35X10-6	UP
LIMK1	1.52	4.11X10-6	UP
LYL1	1.52	6.32X10-5	UP
pp9099	1.51	1.24X10-3	UP
GLA	1.51	5.14X10-4	UP
FGD3	1.51	1.21X10-4	UP
HLA-B	1.51	4.14X10-4	UP
GRB2	1.51	3.19X10-4	UP
C1QG	1.5	2.56X10-2	UP
SELPLG	1.5	8.25X10-4	UP
P2RY8	1.5	3.26X10-3	UP
ARHH	1.5	9.51X10-3	UP
IGFBP3	-1.5	1.33X10-2	DOWN
FZD1	-1.5	2.92X10-4	DOWN
LRRC17	-1.5	1.56X10-3	DOWN
BTEB1	-1.51	8.80X10-3	DOWN
WASL	-1.52	9.56X10-4	DOWN
ARGBP2	-1.52	5.87X10-3	DOWN
TNFRSF11B	-1.52	5.51X10-3	DOWN
DKFZp586C0721	-1.52	4.82X10-5	DOWN
SBSPON	-1.52	1.16X10-2	DOWN
COL6A2	-1.52	9.50X10-3	DOWN
ITGBL1	-1.52	1.12X10-2	DOWN
PCOLCE2	-1.53	1.60X10-5	DOWN
AKR1C3	-1.53	3.68X10-3	DOWN
Hs.296031	-1.53	2.01X10-3	DOWN
LOC377697	-1.53	4.23X10-3	DOWN
HEYL	-1.53	1.02X10-2	DOWN
UCC1	-1.53	2.94X10-3	DOWN
IGFBP5	-1.53	1.46X10-2	DOWN
FAT	-1.53	2.53X10-3	DOWN
PRKCDBP	-1.54	1.63X10-2	DOWN
CASQ2	-1.54	1.00X10-2	DOWN
CAV2	-1.54	1.30X10-3	DOWN
GDF15	-1.54	2.56X10-3	DOWN
CDH13	-1.54	8.57X10-6	DOWN
C5orf4	-1.55	7.71X10-4	DOWN
JPH2	-1.55	1.66X10-3	DOWN
EHD2	-1.55	1.43X10-2	DOWN
KCNK15	-1.55	7.41X10-3	DOWN
ALDH1B1	-1.56	1.31X10-4	DOWN
C10orf48	-1.56	4.91X10-5	DOWN
KIAA1495	-1.56	2.36X10-4	DOWN
C9orf58	-1.56	1.61X10-2	DOWN
MT1J	-1.56	1.60X10-2	DOWN
LOC119587	-1.56	2.39X10-2	DOWN
AKR1C2	-1.56	2.40X10-2	DOWN
TACC2	-1.57	8.51X10-4	DOWN
GSN	-1.57	1.12X10-2	DOWN
ESAM	-1.57	2.40X10-2	DOWN
PDGFA	-1.57	3.49X10-3	DOWN
LOC148872	-1.58	2.36X10-4	DOWN
PRG4	-1.58	5.53X10-3	DOWN
PERP	-1.58	2.99X10-4	DOWN
DAAM2	-1.58	7.90X10-3	DOWN
CRIP2	-1.58	4.23X10-2	DOWN
A2M	-1.59	1.06X10-5	DOWN
FLJ22655	-1.59	1.84X10-2	DOWN
FIBIN	-1.6	1.41X10-6	DOWN
AGTR1	-1.6	1.20X10-3	DOWN
HSPB1	-1.6	6.87X10-3	DOWN
KIAA0830	-1.6	2.77X10-3	DOWN
RHBDF1	-1.6	8.49X10-4	DOWN
ASS	-1.6	1.55X10-2	DOWN
RECK	-1.6	4.38X10-5	DOWN
FLJ10159	-1.6	7.57X10-4	DOWN
CDO1	-1.61	1.59X10-3	DOWN
SLPI	-1.61	4.02X10-2	DOWN
MGC21621	-1.62	8.49X10-3	DOWN
DMPK	-1.62	1.08X10-2	DOWN
GAS6	-1.62	2.20X10-2	DOWN
TIMP4	-1.62	6.43X10-3	DOWN
COL4A1	-1.62	1.83X10-2	DOWN
PLSCR4	-1.62	1.53X10-2	DOWN
MUSTN1	-1.63	3.82X10-2	DOWN
DKFZP564K1964	-1.63	1.03X10-2	DOWN
MTHFD2	-1.63	4.61X10-5	DOWN
MRVI1	-1.63	1.95X10-3	DOWN
RBMS3	-1.63	3.02X10-4	DOWN
COL4A5	-1.64	2.46X10-4	DOWN
DPYSL3	-1.64	4.39X10-3	DOWN
DKFZp434D0215	-1.64	3.54X10-3	DOWN
EBF	-1.65	6.16X10-4	DOWN
KIAA0527	-1.65	1.19X10-6	DOWN
STEAP2	-1.65	7.69X10-4	DOWN
ACADL	-1.65	5.66X10-6	DOWN
TMEPAI	-1.66	4.77X10-3	DOWN
HOXC6	-1.67	3.07X10-3	DOWN
DOC1	-1.67	2.44X10-2	DOWN
NAV2	-1.68	3.95X10-4	DOWN
CNN3	-1.69	1.97X10-2	DOWN
COL21A1	-1.69	1.77X10-4	DOWN
PRRX2	-1.7	9.30X10-4	DOWN
KIAA1340	-1.71	4.64X10-4	DOWN
MIG-6	-1.72	5.14X10-3	DOWN
AGT	-1.72	5.18X10-3	DOWN
PDLIM7	-1.72	3.67X10-3	DOWN
PAM	-1.72	1.32X10-4	DOWN
INPP5A	-1.72	2.81X10-3	DOWN
hmm1364	-1.73	1.23X10-3	DOWN
DKFZp761D221	-1.73	6.25X10-6	DOWN
HEY2	-1.74	1.39X10-4	DOWN
FXYD1	-1.74	2.66X10-2	DOWN
MYOC	-1.74	5.54X10-4	DOWN
KIAA1233	-1.74	7.06X10-4	DOWN
SH3BGR	-1.74	3.08X10-4	DOWN
PPAP2A	-1.75	2.66X10-2	DOWN
STK38L	-1.75	1.54X10-6	DOWN
CFL2	-1.75	3.13X10-4	DOWN
FSTL1	-1.75	1.25X10-2	DOWN
DACT3	-1.76	1.26X10-4	DOWN
C1S	-1.76	2.97X10-2	DOWN
NNMT	-1.76	1.60X10-2	DOWN
FEZ1	-1.76	4.04X10-3	DOWN
SVIL	-1.76	3.38X10-4	DOWN
SGCB	-1.77	1.92X10-4	DOWN
SHRM	-1.77	6.52X10-5	DOWN
NPR1	-1.77	4.35X10-5	DOWN
Hs.356835	-1.78	1.11X10-3	DOWN
FGF13	-1.78	4.72X10-6	DOWN
HSPB2	-1.79	8.40X10-4	DOWN
LOC347348	-1.79	1.15X10-5	DOWN
LAMC1	-1.8	3.28X10-3	DOWN
LAMA2	-1.8	7.36X10-3	DOWN
GMDS	-1.81	1.00X10-6	DOWN
PDGFRA	-1.82	4.45X10-3	DOWN
COL4A2	-1.82	9.68X10-3	DOWN
LOC83690	-1.82	1.26X10-5	DOWN
GADD45G	-1.83	1.59X10-4	DOWN
GLDN	-1.84	6.02X10-5	DOWN
LAMA5	-1.84	5.83X10-3	DOWN
CP	-1.84	1.56X10-4	DOWN
MGC15737	-1.85	3.57X10-4	DOWN
FLJ21174	-1.85	1.62X10-4	DOWN
ZAK	-1.85	2.59X10-4	DOWN
TGFB1I1	-1.85	3.44X10-3	DOWN
DDIT4	-1.85	1.57X10-3	DOWN
GJA1	-1.86	2.10X10-4	DOWN
RGMA	-1.87	1.17X10-3	DOWN
C1orf24	-1.87	5.37X10-5	DOWN
FAM46B	-1.87	3.54X10-6	DOWN
RRAS	-1.87	3.83X10-3	DOWN
VCL	-1.88	9.03X10-4	DOWN
ECRG4	-1.89	5.63X10-3	DOWN
PDGFRB	-1.9	2.08X10-2	DOWN
CD151	-1.9	2.05X10-3	DOWN
NR2F2	-1.9	2.27X10-3	DOWN
KIAA0062	-1.91	2.41X10-3	DOWN
CKMT2	-1.91	5.49X10-5	DOWN
Hs.101689	-1.92	3.43X10-4	DOWN
PROS1	-1.92	1.32X10-3	DOWN
PTGIS	-1.93	5.41X10-3	DOWN
CLU	-1.93	8.41X10-3	DOWN
MAP1B	-1.93	3.59X10-4	DOWN
SRPX	-1.93	3.31X10-3	DOWN
KCNMA1	-1.93	6.40X10-5	DOWN
CSRP1	-1.94	6.08X10-4	DOWN
LOC401059	-1.95	3.98X10-6	DOWN
GRK5	-1.95	4.46X10-5	DOWN
CYBRD1	-1.95	2.62X10-4	DOWN
NPTX2	-1.96	1.02X10-4	DOWN
TGFBR3	-1.96	4.76X10-4	DOWN
ZNF385D	-1.96	5.38X10-4	DOWN
CLIC4	-1.97	8.80X10-6	DOWN
PHGDH	-1.99	7.73X10-4	DOWN
SELM	-2	1.33X10-2	DOWN
LTBP2	-2	1.51X10-3	DOWN
OMD	-2.01	8.88X10-4	DOWN
PDE8B	-2.01	1.42X10-7	DOWN
IGFBP7	-2.01	1.67X10-2	DOWN
FLJ32389	-2.02	1.09X10-2	DOWN
SERPING1	-2.03	9.60X10-3	DOWN
FBLN1	-2.03	4.56X10-2	DOWN
HSPB8	-2.04	6.58X10-4	DOWN
ANKRD25	-2.04	5.24X10-3	DOWN
HEPH	-2.05	1.34X10-4	DOWN
MYLK	-2.05	8.08X10-5	DOWN
MAOB	-2.06	1.91X10-3	DOWN
PLA2G2A	-2.06	4.32X10-2	DOWN
FOXC1	-2.07	1.88X10-3	DOWN
EPS8	-2.07	1.60X10-6	DOWN
LOC114990	-2.08	6.02X10-3	DOWN
MT1X	-2.09	8.04X10-3	DOWN
WISP2	-2.09	1.05X10-2	DOWN
NCKAP1	-2.09	6.35X10-4	DOWN
KIAA0992	-2.1	2.85X10-4	DOWN
DUSP26	-2.1	8.79X10-6	DOWN
ASPN	-2.11	4.51X10-4	DOWN
FLJ20701	-2.11	5.80X10-7	DOWN
FLJ46603	-2.11	9.39X10-3	DOWN
LOC401093	-2.11	1.04X10-3	DOWN
LIMS2	-2.12	2.82X10-3	DOWN
PKD2	-2.13	1.68X10-6	DOWN
CRLF1	-2.13	3.53X10-4	DOWN
FMOD	-2.14	1.92X10-3	DOWN
EFEMP1	-2.15	1.20X10-4	DOWN
RERG	-2.15	3.25X10-4	DOWN
AOC3	-2.17	1.13X10-4	DOWN
FMO2	-2.19	5.20X10-4	DOWN
FBLP-1	-2.19	2.61X10-5	DOWN
RBPMS	-2.2	6.74X10-3	DOWN
ACTA2	-2.2	2.68X10-3	DOWN
YAP1	-2.2	4.30X10-4	DOWN
AQP1	-2.2	1.59X10-2	DOWN
NFIA	-2.21	5.61X10-5	DOWN
Lrp2bp	-2.21	7.00X10-5	DOWN
NEXN	-2.22	8.59X10-5	DOWN
C14orf141	-2.24	1.77X10-3	DOWN
ANTXR1	-2.25	7.70X10-4	DOWN
JAM3	-2.27	4.90X10-4	DOWN
NET1	-2.27	5.61X10-4	DOWN
ANKRD15	-2.28	2.30X10-5	DOWN
SOST	-2.28	4.18X10-4	DOWN
PFN2	-2.29	7.06X10-5	DOWN
PLEKHC1	-2.29	9.26X10-4	DOWN
GADD45A	-2.29	1.90X10-5	DOWN
SMTN	-2.29	2.89X10-3	DOWN
APOD	-2.31	4.90X10-2	DOWN
ADH5	-2.31	9.42X10-6	DOWN
ATOH8	-2.31	1.50X10-5	DOWN
KCNMB1	-2.34	4.09X10-4	DOWN
FBXO32	-2.34	7.42X10-5	DOWN
SLC25A4	-2.35	4.87X10-4	DOWN
GPRC5C	-2.35	9.58X10-6	DOWN
LOC399959	-2.36	1.04X10-4	DOWN
KCNAB1	-2.38	7.63X10-6	DOWN
LPP	-2.39	9.42X10-5	DOWN
ADRA2C	-2.39	1.76X10-3	DOWN
CSRP2	-2.4	2.20X10-4	DOWN
AEBP1	-2.4	8.41X10-3	DOWN
MFGE8	-2.4	5.07X10-4	DOWN
MFAP4	-2.41	2.99X10-3	DOWN
LOC399865	-2.42	2.61X10-4	DOWN
IL13RA2	-2.44	2.52X10-8	DOWN
LOC387763	-2.46	2.08X10-2	DOWN
COL8A1	-2.46	8.39X10-4	DOWN
FHL5	-2.46	1.99X10-5	DOWN
ZBTB16	-2.48	3.08X10-4	DOWN
DMN	-2.49	9.29X10-4	DOWN
ACTG2	-2.5	1.31X10-2	DOWN
CYP4B1	-2.5	1.88X10-4	DOWN
LMO3	-2.5	2.96X10-5	DOWN
MGP	-2.51	2.25X10-3	DOWN
DKK3	-2.53	1.20X10-3	DOWN
PLS3	-2.56	1.32X10-4	DOWN
THBS2	-2.57	9.69X10-4	DOWN
APEG1	-2.58	8.01X10-6	DOWN
PRUNE2	-2.61	2.83X10-8	DOWN
SPRY1	-2.61	3.47X10-5	DOWN
CCDC3	-2.62	1.84X10-3	DOWN
LMCD1	-2.62	1.60X10-3	DOWN
PPP1R14A	-2.63	8.02X10-5	DOWN
LOC255743	-2.63	3.99X10-5	DOWN
ADSSL1	-2.64	3.53X10-7	DOWN
SYNPO2	-2.65	1.08X10-5	DOWN
DSTN	-2.66	5.06X10-6	DOWN
HIG2	-2.68	1.69X10-5	DOWN
SCRG1	-2.68	2.47X10-4	DOWN
CPE	-2.69	4.09X10-4	DOWN
CALD1	-2.7	5.20X10-5	DOWN
IGFBP6	-2.71	2.84X10-3	DOWN
CNN1	-2.77	3.56X10-3	DOWN
PDGFD	-2.78	2.43X10-6	DOWN
PCDH7	-2.8	5.29X10-7	DOWN
PDLIM3	-2.82	1.87X10-4	DOWN
RASL12	-2.85	2.80X10-4	DOWN
Hs.5724	-2.85	2.05X10-5	DOWN
LMOD1	-2.86	3.06X10-5	DOWN
SMOC2	-2.86	6.17X10-4	DOWN
GPX3	-2.87	6.95X10-4	DOWN
HSPB7	-2.92	1.12X10-5	DOWN
FBLN5	-2.92	1.47X10-5	DOWN
ACTC1	-2.95	5.81X10-6	DOWN
MAOA	-2.95	6.18X10-6	DOWN
IGFBP2	-2.97	7.43X10-5	DOWN
CRYAB	-2.98	3.65X10-4	DOWN
LDOC1	-2.98	1.93X10-4	DOWN
RAMP1	-2.99	8.78X10-7	DOWN
FLJ21986	-2.99	5.18X10-6	DOWN
TMEM47	-3.01	5.80X10-5	DOWN
TAGLN	-3.01	3.05X10-3	DOWN
FHL1	-3.03	5.07X10-5	DOWN
SPARCL1	-3.06	1.09X10-4	DOWN
MYL9	-3.08	7.76X10-4	DOWN
ADH1C	-3.11	2.76X10-5	DOWN
PRELP	-3.13	4.36X10-4	DOWN
SORBS1	-3.16	1.36X10-4	DOWN
RCAN2	-3.16	2.39X10-5	DOWN
SOD3	-3.19	1.30X10-3	DOWN
APM2	-3.2	2.82X10-4	DOWN
LTBP1	-3.21	1.11X10-5	DOWN
NOV	-3.26	7.95X10-6	DOWN
PLN	-3.28	3.06X10-7	DOWN
KCNA5	-3.29	3.70X10-8	DOWN
EFHD1	-3.38	6.23X10-6	DOWN
RGS5	-3.42	1.30X10-6	DOWN
OGN	-3.43	1.03X10-4	DOWN
FRZB	-3.49	4.33X10-6	DOWN
ADH1A	-3.53	8.31X10-5	DOWN
MYH11	-3.54	9.62X10-4	DOWN
TPM2	-3.59	7.56X10-4	DOWN
MYH10	-3.62	1.29X10-5	DOWN
C6orf117	-3.66	5.03X10-10	DOWN
ITGA8	-3.67	5.82X10-8	DOWN
ADH1B	-3.67	1.14X10-4	DOWN
TCEAL2	-3.78	4.44X10-12	DOWN
C10orf10	-3.82	3.32X10-6	DOWN
PPP1R3C	-4.2	7.45X10-8	DOWN
